# Supplementary material for: Graft copolymers of hydroxyethyl cellulose by a ‘grafting to’ method:15N labelling as a powerful characterisation tool in ‘click’ polymer chemistry
Source: Royal Society of Chemistry journal article supplement (doi:10.1039/c4py01413h), 2014-12-08
Supplement: c4py01413h1.pdf [file c4py01413h1.pdf]

## Supplementary Information

### Graft copolymers of hydroxyethyl cellulose by a 'grafting to' method: $^{15}\text{N}$ labelling as a powerful characterisation tool in 'click' polymer chemistry

Fanny Joubert, Osama Musa, David R. W. Hodgson and Neil R. Cameron\*

#### RAFT Polymerisations

Synthesis of RAFT agents **5** and **8** are shown in Schemes S1 and S2 respectively.

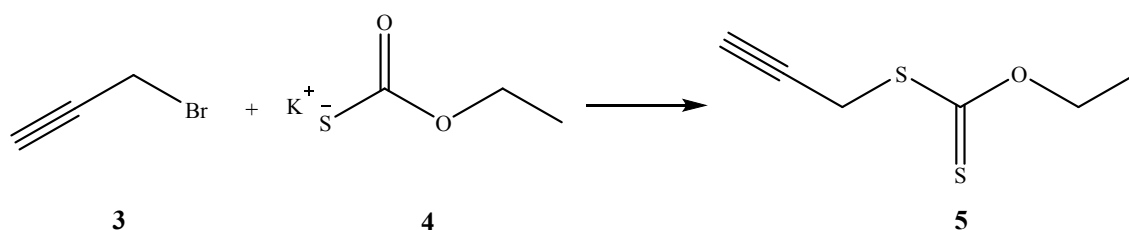

**Scheme S1:** Preparation of O-ethyl S-prop-2-ynyl carbonodithiolate (**5**)

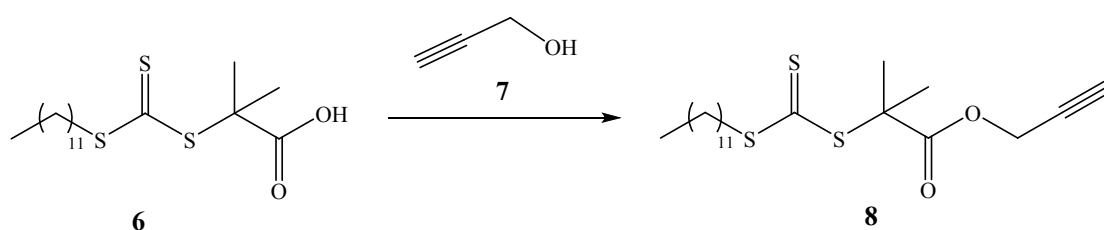

**Scheme S2:** Synthesis of alkyne-terminated trithiocarbonate (**8**)

Polymerisation of NVP and NIPAAm are shown in Schemes S3 and S4.

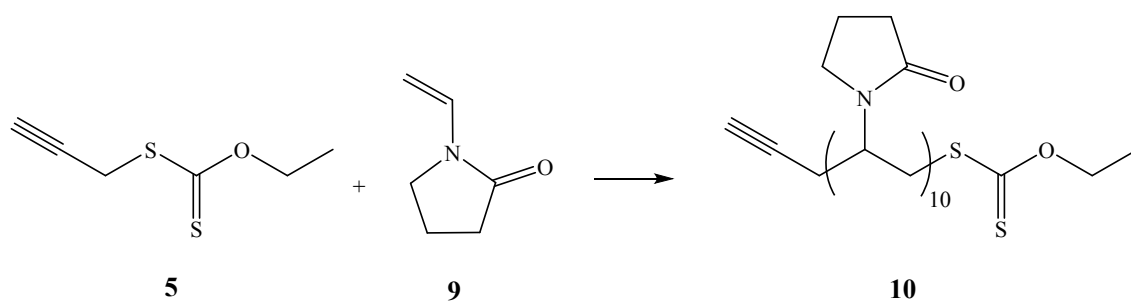

**Scheme S3:** RAFT polymerisation of NVP

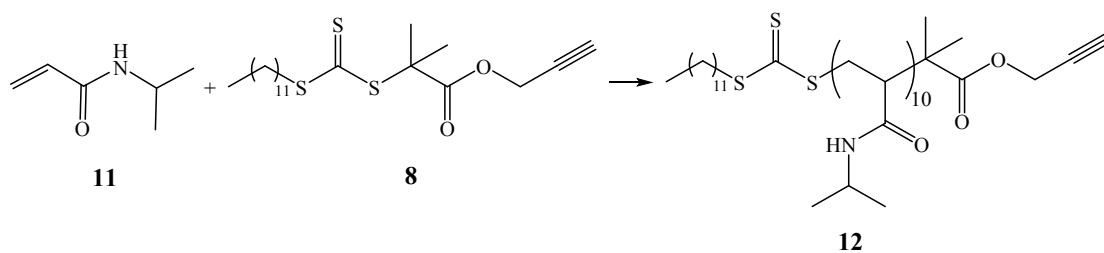

**Scheme S4:** RAFT polymerisation of NIPAAm

Selected data for PVP and PNIPAAm prepared by RAFT are shown in Figures S1-4.

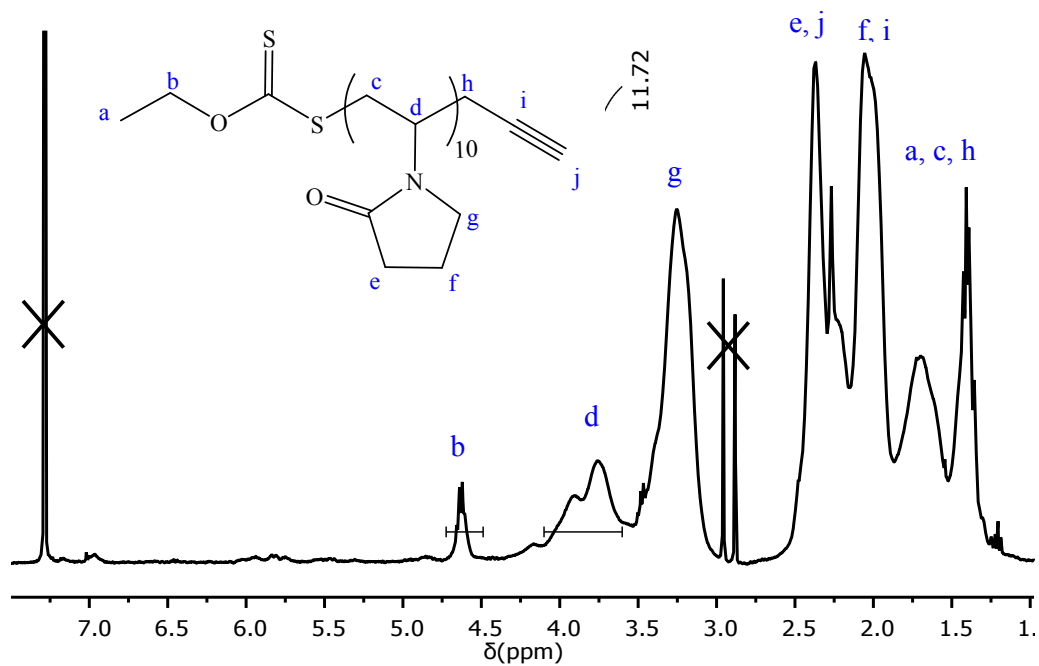

**Figure S1:** Solution state  $^1\text{H}$  NMR ( $\text{CDCl}_3$ , 400 MHz) spectrum of poly(N-vinylpyrrolidone) (PVP) **10** ( $\text{DP}_{\text{targeted}}=10$ )

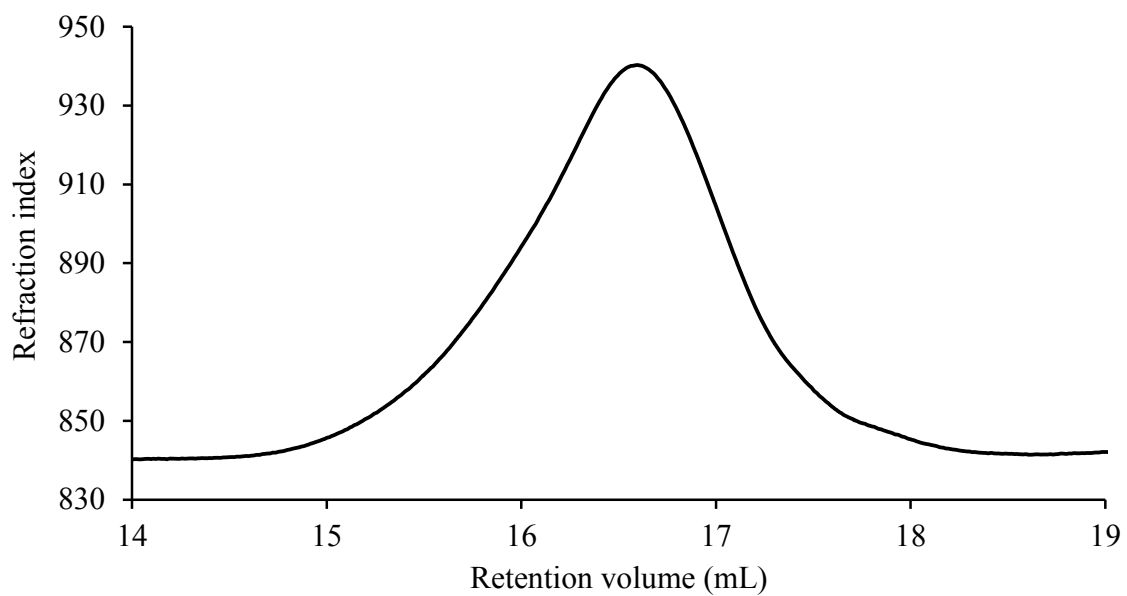

**Figure S2:** Results of SEC analysis of poly(N-vinylpyrrolidone) (PVP) ( $\text{DP}_{\text{targeted}}=10$ )

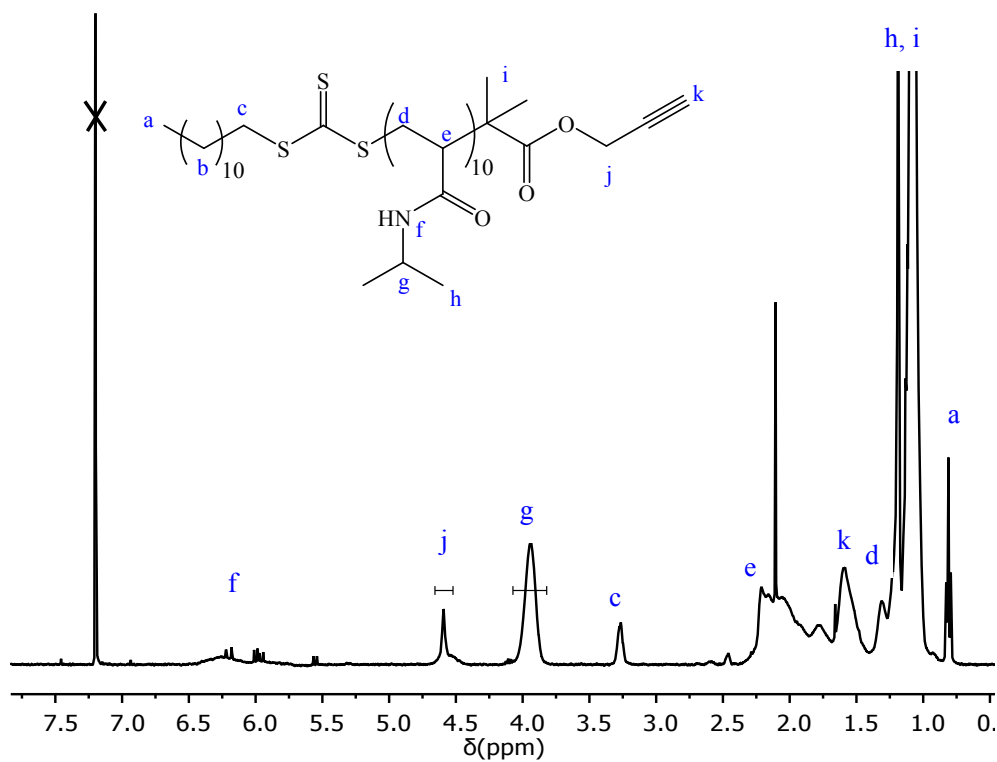

**Figure S3:** Solution state <sup>1</sup>H NMR spectrum (400 MHz, CDCl<sub>3</sub>) of PNIPAAM 12

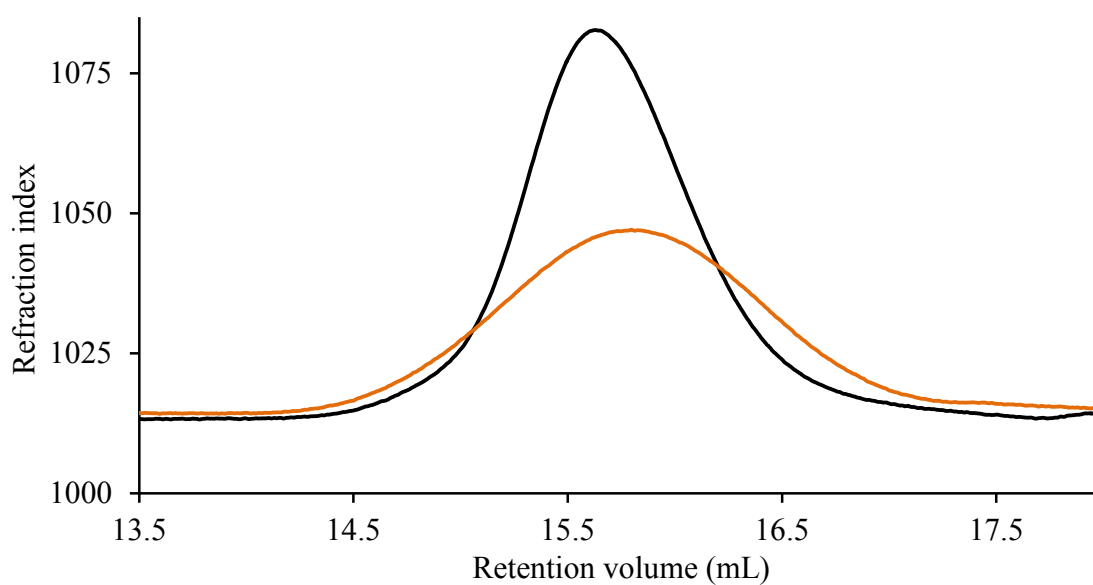

**Figure S4:** Results of the SEC analysis of PNIPAAM<sub>10</sub> polymerised using trithiocarbonate 8 (black) and xanthate 5 (orange) as chain transfer agent

The xanthate (**5**) that was used to polymerise NVP was also used to polymerise NIPAAM (Figure S4). However, only 60% monomer conversion was obtained after overnight reaction and the molecular weight distribution was broader compared to that obtained with the trithiocarbonate ( $D_M=1.5$  vs. 1.2).

### CuAAC Coupling Reactions

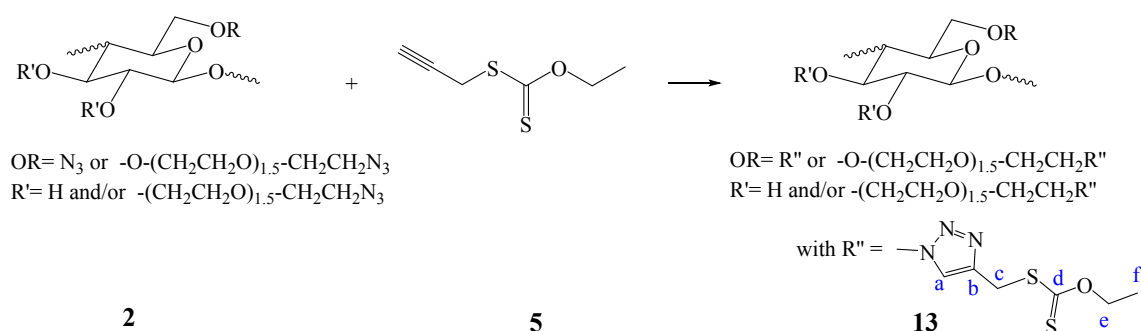

**Scheme S5:** CuAAC between N<sub>3</sub>-HEC and transfer agent

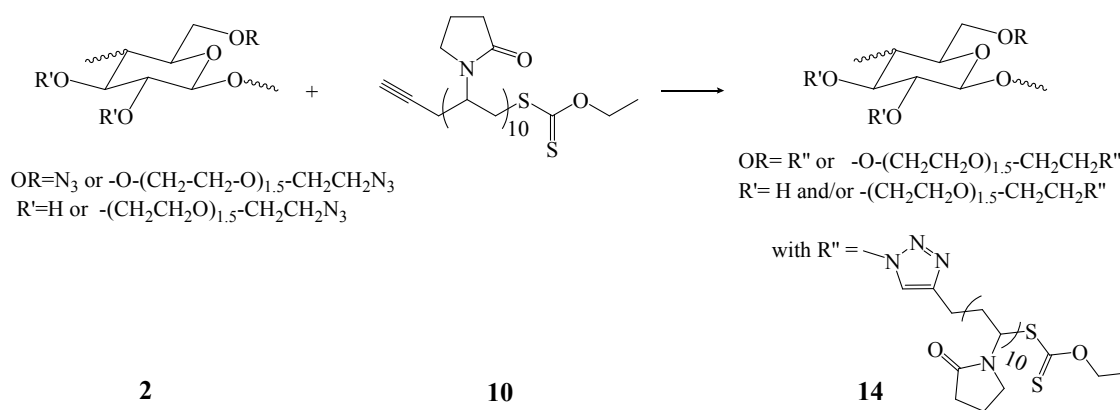

**Scheme S6:** CuAAC reaction between N<sub>3</sub>-HEC and alkyne-terminated PVP<sub>10</sub>

The numbering scheme used in the NMR characterisation of HEC-g-PVP is shown in Figure S5.

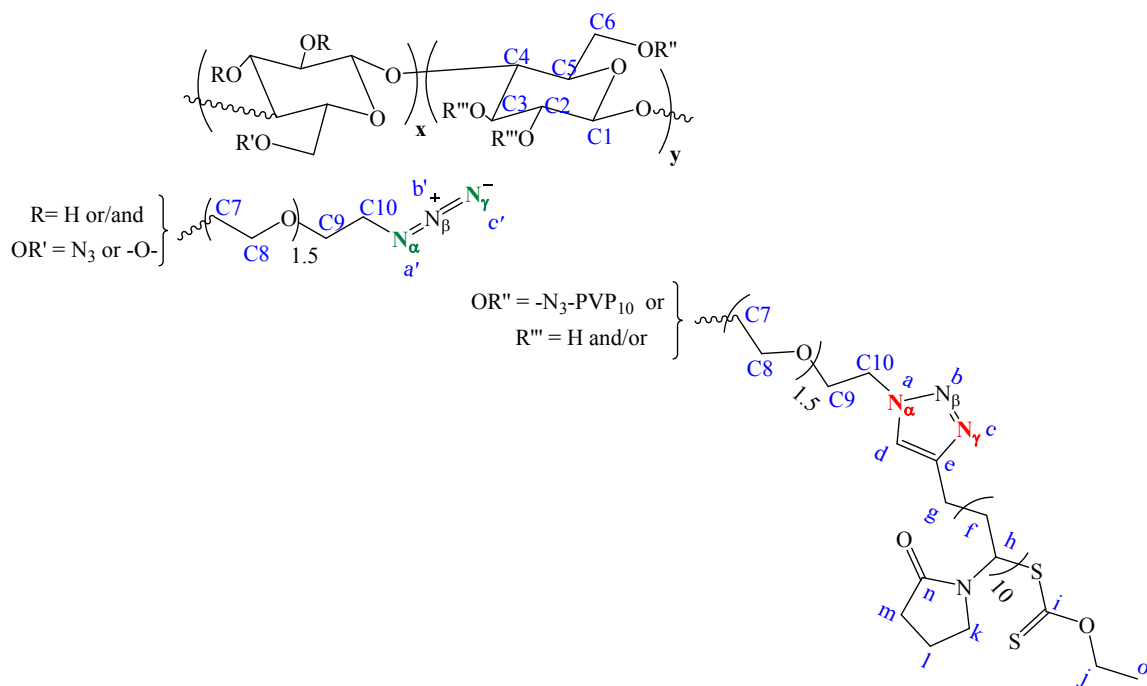

**Figure S5:** Numbering of the molecular structure of HEC-g-PVP<sub>10</sub>, where x and y represent the degree of functionalization

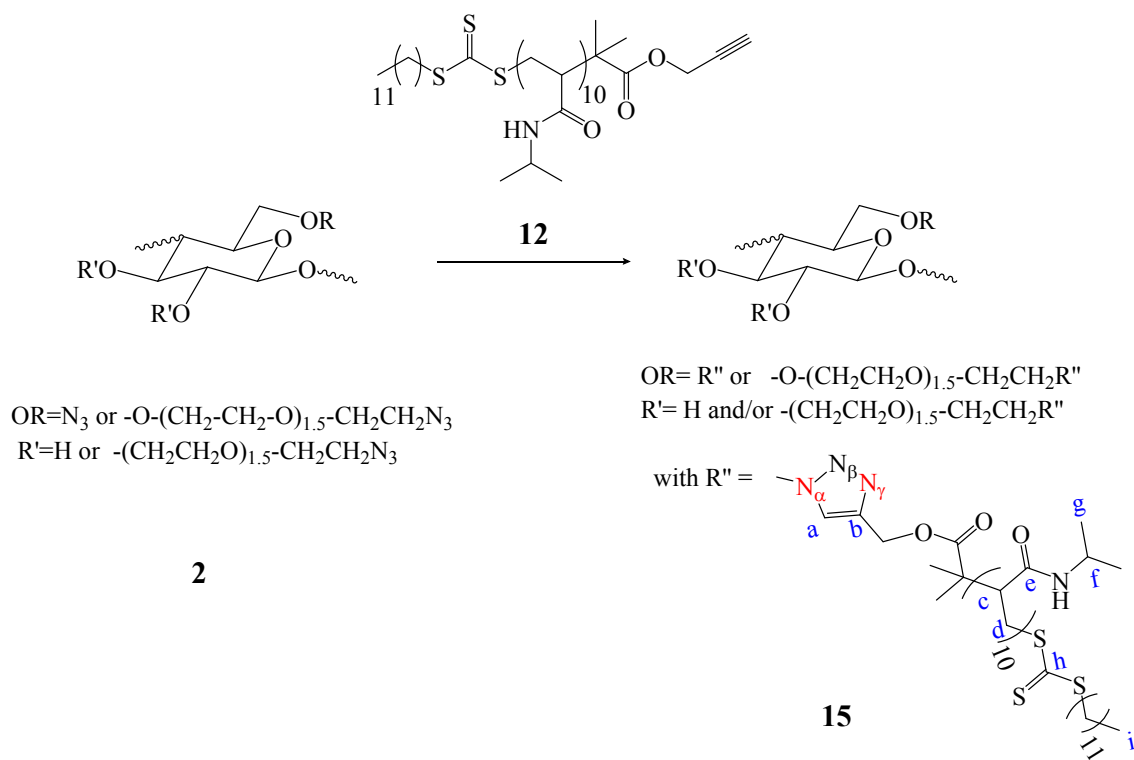

**Scheme S6:** CuAAC between alkyne-ended PNIPAAm<sub>10</sub> and partially labelled N<sub>3</sub>-HEC

The FTIR spectrum of the coupled product, showing the disappearance of the azide peak, is shown in Figure S6.

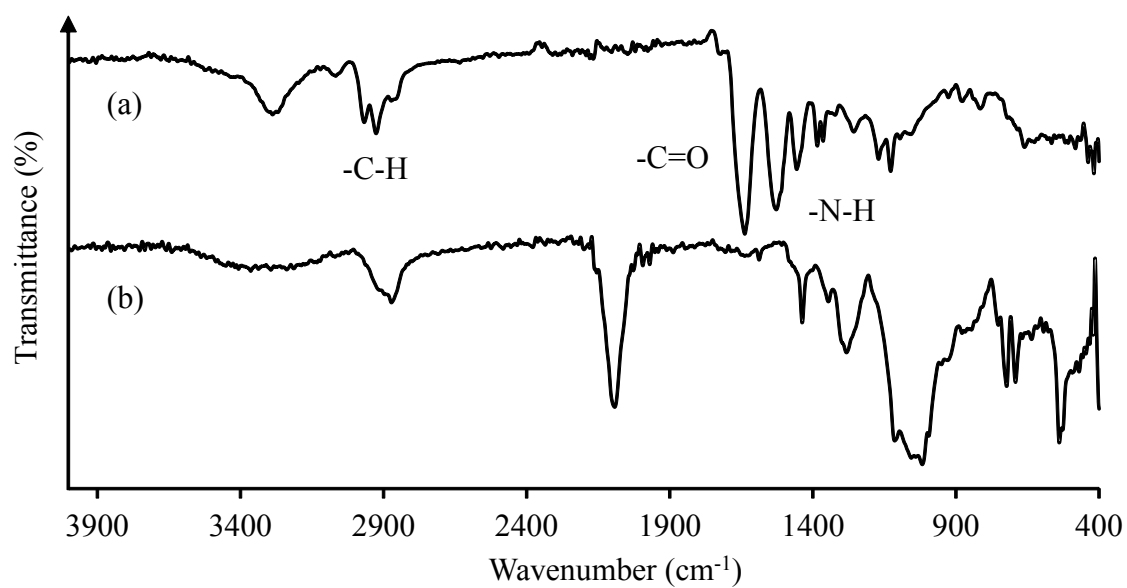

**Figure S6:** FT-IR spectrum of (a) HEC-g-PNIPAAm<sub>10</sub> and (b) N<sub>3</sub>-HEC
